# Supplementary material
Source: PubMed Central journal article supplement (PMC5815055)
Supplement: jamacardiol-2-1256-s001.pdf [file jamacardiol-2-1256-s001.pdf]

## Supplementary Online Content

Irizarry OC, Levine LD, Lewey J, et al. Comparison of clinical characteristics and outcomes of peripartum cardiomyopathy between African American and non–African American women. *JAMA Cardiol*. Published online October 11, 2017. doi:10.1001/jamacardio.2017.3574

**eFigure 1.** Inclusion Flowchart

**eFigure 2.** PPCM End Points

**eTable 1.** Incidence of Arrhythmias

**eTable 2.** Presenting Demographic and Clinical Characteristics and Clinical Outcomes in Subset of Women for Whom All Data Are Available (n = 113)

**eTable 3.** Presenting Demographic and Clinical Characteristics and Clinical Outcomes in the Contemporary Subset of Women Presenting on or After the Year 2000 (n = 190)

This supplementary material has been provided by the authors to give readers additional information about their work.

**eFigure 1. Inclusion Flowchart**

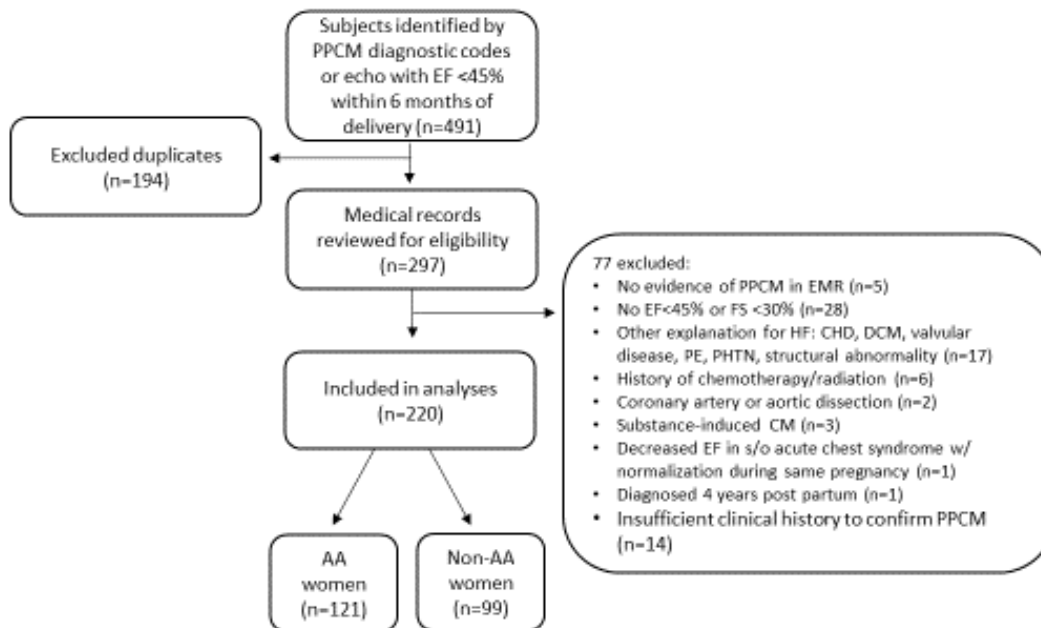

EF= ejection fraction, FS=fractional shortening, HF=heart failure, CHD=congenital heart disease, PE=pulmonary embolism, PHTN=pulmonary hypertension, EMR=electronic medical record, CM=cardiomyopathy. P-values correspond to racial comparison.

**eFigure 2. PPCM End Points**

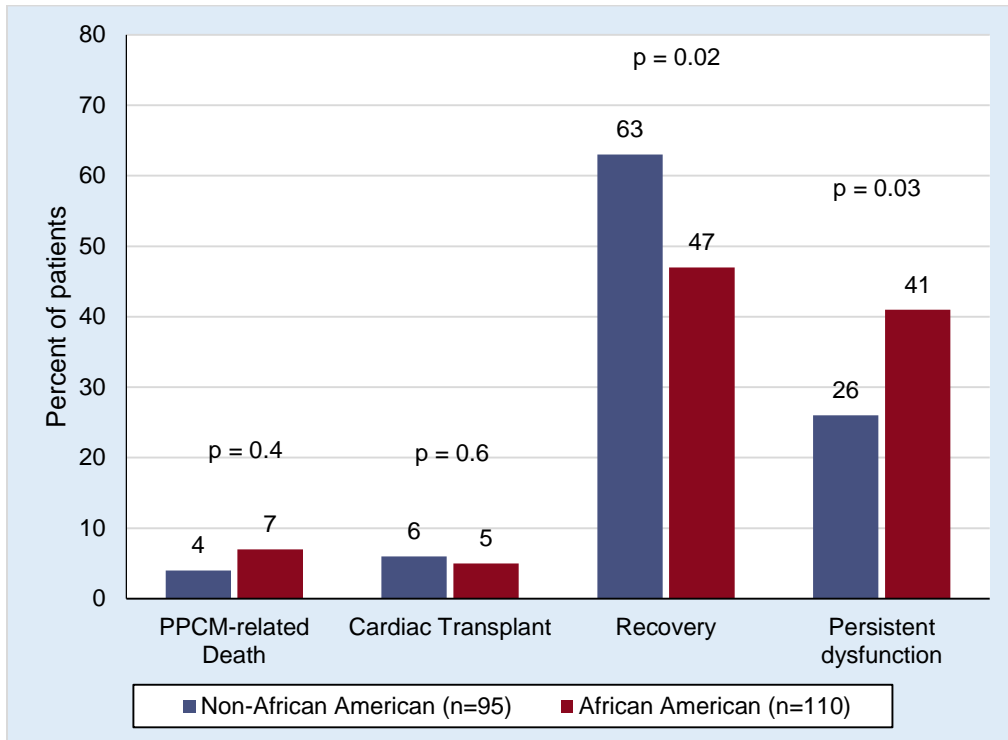

Percent of patients noted to have each of four mutually exclusive PPCM end points are shown, stratified by race.

**eTable 1. Incidence of Arrhythmias**

|                              | Non-AA (n=99) | AA (n=121) | P     |
|------------------------------|---------------|------------|-------|
| Arrhythmia                   | 31            | 26         | 0.098 |
| Supraventricular arrhythmias | 9             | 10         | 0.45  |
| Ventricular arrhythmias      | 17            | 13         | 0.716 |
| Brady-arrhythmias            | 4             | 2          | 0.523 |
| Unknown                      | 1             | 1          | -     |

**eTable 2.** Presenting Demographic and Clinical Characteristics and Clinical Outcomes in Subset of Women for Whom All Data Are Available (n = 113)

| <i>Parameter</i>                                                           | <i>Overall PPCM<br/>(n=113)</i> | <i>African American<br/>(n=57)</i> | <i>Non-African<br/>American (n=56)</i> | <i>p</i>           |
|----------------------------------------------------------------------------|---------------------------------|------------------------------------|----------------------------------------|--------------------|
| Mean age, years                                                            | 30.6 ± 7.0                      | 29.1 ± 7.5                         | 32.2 ± 6.2                             | 0.02 <sup>b</sup>  |
| Age > 30y, no. (%)                                                         | 60 (53%)                        | 24 (42%)                           | 36 (64%)                               | 0.02               |
| Time of diagnosis,                                                         |                                 |                                    |                                        |                    |
| Antepartum, no. (%)                                                        | 13 (12%)                        | 7 (12%)                            | 6 (11%)                                | 0.8                |
| Postpartum, no. (%)                                                        | 100 (89%)                       | 50 (88%)                           | 50 (89%)                               | 0.8                |
| Chronic hypertension, no. (%)                                              | 9 (8%)                          | 8 (14%)                            | 1 (2%)                                 | 0.02               |
| Pregnancy-related hypertension, no. (%)                                    | 48 (42%)                        | 26 (46%)                           | 22 (39%)                               | 0.5                |
| Parity prior to PPCM diagnosis, no. (%)                                    |                                 |                                    |                                        |                    |
| Nulliparous                                                                | 60 (53%)                        | 24 (42%)                           | 36 (64%)                               | 0.02               |
| Multiparous                                                                | 53 (46%)                        | 32 (56%)                           | 20 (36%)                               | 0.03               |
| Unknown                                                                    | 1 (1%)                          | 1 (2%)                             | 0 (0%)                                 | 0.3                |
| Twin pregnancy, no. (%)                                                    | 17 (15%)                        | 5 (9%)                             | 12 (21%)                               | 0.06               |
| Cesarean delivery, no. (%)                                                 | 68 (60%)                        | 27 (47%)                           | 41 (73%)                               | 0.005              |
| Presenting EF, mean ± SD                                                   | 28 ± 13                         | 26 ± 13                            | 30 ± 12                                | 0.055 <sup>c</sup> |
| Presenting EF <30%, no. (%)                                                | 56 (50%)                        | 34 (60%)                           | 22 (39%)                               | 0.03               |
| Follow-up EF, mean ± SD                                                    | 39 ± 14                         | 36 ± 14                            | 42 ± 13                                | 0.03 <sup>d</sup>  |
| Worst EF, mean ± SD                                                        | 26 ± 12                         | 23 ± 13                            | 29 ± 12                                | 0.02 <sup>e</sup>  |
| Worsen after diagnosis, no. (%)                                            | 37 (32%)                        | 23 (40%)                           | 14 (25%)                               | 0.08               |
| Documentation EF>50, no. (%)                                               | 78 (69%)                        | 34 (60%)                           | 44 (79%)                               | 0.03               |
| Time to EF>50, median days (Q <sub>1</sub> , Q <sub>3</sub> ) <sup>a</sup> | 129 (52, 303)                   | 240.5 (75, 696.5)                  | 105 (52, 248)                          | 0.056              |

a: n=61; 20 AA; 41 non-AA

b: Cohen's *d*=0.45

c: Cohen's *d*=0.32

d: Cohen's *d*=0.44

e: Cohen's *d*=0.48

P-values correspond to racial comparison.

**eTable 3.** Presenting Demographic and Clinical Characteristics and Clinical Outcomes in the Contemporary Subset of Women Presenting on or After the Year 2000 (n = 190)

| <i>Parameter</i>                                                           | <i>Overall PPCM<br/>(n=190)</i> | <i>African American<br/>(n=106)</i> | <i>Non-African<br/>American (n=84)</i> | <i>p</i>            |
|----------------------------------------------------------------------------|---------------------------------|-------------------------------------|----------------------------------------|---------------------|
| Mean age, years                                                            | 29.4 ± 6.7                      | 27.6±6.5                            | 31.8±6.2                               | <0.001 <sup>i</sup> |
| Age > 30y, no. (%)                                                         | 82 (43%)                        | 31 (30%)                            | 51 (61%)                               | <0.001              |
| Time of diagnosis, (n=185)                                                 |                                 |                                     |                                        |                     |
| Antepartum, no. (%)                                                        | 16 (8%)                         | 9 (9%)                              | 7 (9%)                                 | 0.96                |
| Postpartum, no. (%)                                                        | 169 (91%)                       | 94 (91%)                            | 75 (91%)                               | 0.96                |
| Chronic hypertension, no. (%) <sup>a</sup>                                 | 15 (10%)                        | 14 (17%)                            | 1 (1%)                                 | 0.002               |
| Pregnancy-related hypertension, no. (%) <sup>b</sup>                       | 73 (46%)                        | 44 (51%)                            | 29 (40%)                               | 0.2                 |
| Parity prior to PPCM diagnosis, no. (%)                                    |                                 |                                     |                                        |                     |
| Nulliparous                                                                | 92 (48%)                        | 44 (42%)                            | 48 (57%)                               | 0.03                |
| Multiparous                                                                | 92 (48%)                        | 58 (55%)                            | 34 (40%)                               | 0.05                |
| Unknown                                                                    | 6 (3%)                          | 4 (4%)                              | 2 (2%)                                 | 0.6                 |
| Twin pregnancy, no. (%) <sup>c</sup>                                       | 23 (12%)                        | 8 (8%)                              | 15 (18%)                               | 0.03                |
| Cesarean delivery, no. (%) <sup>d</sup>                                    | 103 (56%)                       | 49 (49%)                            | 54 (66%)                               | 0.02                |
| Presenting EF, mean ± SD <sup>e</sup>                                      | 29 ± 13                         | 27 ± 13                             | 31 ± 12                                | 0.07 <sup>j</sup>   |
| Presenting EF <30%, no. (%) <sup>e</sup>                                   | 75 (48%)                        | 47 (57%)                            | 28 (39%)                               | 0.03                |
| Follow-up EF, mean ± SD <sup>f</sup>                                       | 39 ± 14                         | 36 ± 15                             | 42 ± 14                                | 0.02 <sup>k</sup>   |
| Worst EF, mean ± SD <sup>g</sup>                                           | 27 ± 13                         | 25 ± 13                             | 29 ± 12                                | 0.03 <sup>l</sup>   |
| Worsen after diagnosis, no. (%) <sup>g</sup>                               | 43 (28%)                        | 29 (35%)                            | 14 (19%)                               | 0.03                |
| Documentation EF>50, no. (%)                                               | 124 (65%)                       | 62 (58%)                            | 62 (74%)                               | 0.03                |
| Time to EF>50, median days (Q <sub>1</sub> , Q <sub>3</sub> ) <sup>h</sup> | 170 (67, 355)                   | 265 (89, 552)                       | 129 (52, 291)                          | 0.02                |

a: n=152; 83 AA; 69 non-AA

b: n=158; 86 AA; 72 non-AA

c: n=185; 103 AA; 82 non-AA

d: n=183; 101 AA; 82 non-AA

e: n=155; 83 AA; 72 non-AA

f: n=120; 62 AA; 58 non-AA

g: n=155; 83 AA; 72 non-AA

h: n=77; 30 AA; 47 non-AA

i: Cohen's *d*=0.66

j: Cohen's *d*=0.32

k: Cohen's *d*=0.41

l: Cohen's *d*=0.32

P-values correspond to racial comparison.
